# Supplementary material
Source: Springer Nature journal article supplement (https://www.springermedizin.de/resource/supplementary/12879_2002_55_MOESM6_ESM.pdf/9448058)
Supplement: MOESM6 [file 9448058]

|               | <b>+</b>  | <b>-</b>  | overall charge | coreceptor usage |
|---------------|-----------|-----------|----------------|------------------|
| <b>NL4-3</b>  | <b>12</b> | <b>3</b>  | <b>+9</b>      | <b>X4</b>        |
| <b>NL-952</b> | <b>11</b> | <b>5</b>  | <b>+6</b>      | <b>R5X4</b>      |
| <b>NL-991</b> | <b>7</b>  | <b>5</b>  | <b>+2</b>      | <b>R5</b>        |
| <b>CXCR4</b>  | <b>8</b>  | <b>19</b> | <b>-11</b>     |                  |
| <b>CCR5</b>   | <b>8</b>  | <b>7</b>  | <b>+1</b>      |                  |
